# Supplementary material for: Micro- and nanophase separations in hierarchical self-assembly of strongly amphiphilic block copolymer-based ionic supramolecules
Source: Royal Society of Chemistry journal article supplement (doi:10.1039/c2sm27113c), 2012-12-06
Supplement: c2sm27113c.pdf [file c2sm27113c.pdf]

**Table S1** Modelling Parameters (Eqs. 1-3).

| Sample            | $r^S (\pm 0.5 \text{ \AA})$ | $r_{hs} (\pm 0.1 \text{ \AA})$ | $\phi_{hs} (\pm 0.02)$ |
|-------------------|-----------------------------|--------------------------------|------------------------|
| H-MAA/C8/1.0      | 7.0                         | 11.0                           | 0.36                   |
| S-MAA-8-M/C16/1.0 | 12.0                        | 15.1                           | 0.31                   |
| S-MAA-8-M/C16/0.9 | 11.0                        | 15.8                           | 0.32                   |
| S-MAA-8-M/C16/0.7 | 10.9                        | 16.4                           | 0.32                   |
| S-MAA-8-M/C12/1.0 | 8.8                         | 12.7                           | 0.24                   |
| S-MAA-8-M/C12/0.9 | 9.0                         | 15.0                           | 0.35                   |
| S-MAA-8-M/C12/0.8 | 9.5                         | 14.2                           | 0.30                   |
| S-MAA-8-M/C12/0.7 | 9.1                         | 13.3                           | 0.25                   |
| S-MAA-8-M/C12/0.6 | 9.9                         | 14.7                           | 0.35                   |
| S-MAA-8-M/C12/0.4 | 9.8                         | 14.2                           | 0.34                   |
| S-MAA-8-M/C12/0.2 | 7.8                         | 13.7                           | 0.24                   |
| S-MAA-8-M/C8/1.0  | 6.0                         | 9.7                            | 0.27                   |
| S-MAA-8-M/C8/0.9  | 6.7                         | 9.0                            | 0.26                   |
| S-MAA-15/C16/0.2  | 11.5                        | 15.0                           | 0.24                   |
| S-MAA-15/C16/0.15 | 9.5                         | 17.6                           | 0.36                   |
| S-MAA-15/C16/0.1  | 9.7                         | 14.8                           | 0.21                   |
| S-MAA-15/C12/1.0  | 8.2                         | 12.3                           | 0.28                   |
| S-MAA-15/C12/0.8  | 7.2                         | 13.3                           | 0.34                   |
| S-MAA-15/C12/0.6  | 7.5                         | 12.9                           | 0.28                   |
| S-MAA-15/C12/0.4  | 8.1                         | 13.4                           | 0.33                   |
| S-MAA-15/C12/0.1  | 8.2                         | 14.4                           | 0.34                   |
| S-MAA-15-/C8/1.0  | 6.6                         | 9.4                            | 0.24                   |
| S-MAA-15/C8/0.8   | 6.7                         | 9.7                            | 0.26                   |
| S-MAA-15/C8/0.6   | 6.5                         | 8.8                            | 0.22                   |
| S-MAA-3/C12/1.0   | 9.2                         | 14.2                           | 0.37                   |
| S-MAA-3/C12/0.9   | 7.4                         | 14.0                           | 0.32                   |
| S-MAA-3/C12/0.8   | 8.7                         | 14.4                           | 0.40                   |
| S-MAA-3/C12/0.7   | 8.6                         | 14.3                           | 0.37                   |
| S-MAA-3/C8/1.0    | 6.1                         | 15.4                           | 0.33                   |
| S-MAA-3/C8/0.9    | 6.1                         | 14.8                           | 0.37                   |
| S-MAA-3/C8/0.8    | 6.1                         | 15.0                           | 0.33                   |
| S-MAA-3/C8/0.7    | 6.1                         | 14.3                           | 0.34                   |

**Table S2** Modelling Parameters (Eqs. 1-5).

| Sample            | $R_{\text{AmphComb}} (\pm 1 \text{ \AA})$ | $R_{hs} (\pm 5 \text{ \AA})$ | $\Phi_{hs} (\pm 0.05)$ | $s^a (\pm 0.1)$ |
|-------------------|-------------------------------------------|------------------------------|------------------------|-----------------|
| S-MAA-8-M/C12/0.6 | 84                                        | 124                          | 0.45                   | 0.11            |
| S-MAA-8-M/C12/0.4 | 83                                        | 123                          | 0.48                   | 0.10            |
| S-MAA-8-M/C12/0.2 | 86                                        | 130                          | 0.46                   | 0.15            |
| S-MAA-8-M/C8/0.7  | 83                                        | 141                          | 0.42                   | 0.17            |
| S-MAA-8-M/C8/0.6  | 83                                        | 145                          | 0.44                   | 0.17            |
| S-MAA-8-M/C8/0.5  | 83                                        | 133                          | 0.41                   | 0.13            |
| S-MAA-8-M/C8/0.4  | 83                                        | 127                          | 0.40                   | 0.13            |
| S-MAA-8-M/C8/0.3  | 70                                        | 119                          | 0.45                   | 0.15            |
| S-MAA-8-M/C8/0.2  | 70                                        | 115                          | 0.40                   | 0.14            |
| S-MAA-8-M/C8/0.1  | 60                                        | 110                          | 0.40                   | 0.15            |
| S-MAA-3/C12/1.0   | 68                                        | 141                          | 0.35                   | 0.10            |
| S-MAA-3/C12/0.9   | 67                                        | 144                          | 0.30                   | 0.10            |
| S-MAA-3/C12/0.8   | 66                                        | 139                          | 0.36                   | 0.15            |
| S-MAA-3/C8/1.0    | 68                                        | 125                          | 0.34                   | 0.14            |
| S-MAA-3/C8/0.9    | 57                                        | 116                          | 0.33                   | 0.13            |
| S-MAA-3/C8/0.8    | 56                                        | 117                          | 0.33                   | 0.15            |
| S-MAA-3/C8/0.7    | 56                                        | 111                          | 0.33                   | 0.10            |

<sup>a</sup> relative standard deviation,  $s = \sigma/R_{\text{AmphComb}}$ .
